# Supplementary material for: A novel and highly efficient earth-abundant Cu3P with TiO2“P–N” heterojunction nanophotocatalyst for hydrogen evolution from water
Source: Royal Society of Chemistry journal article supplement (doi:10.1039/c6nr06620h), 2016-01-01
Supplement: c6nr06620h1.pdf [file c6nr06620h1.pdf]

## Supplementary Information

### Novel Earth-abundant Cu<sub>3</sub>P with TiO<sub>2</sub> Architected High Efficient “P-N” Heterojunction Nanophotocatalyst for Water Splitting Hydrogen Evolution

Xinzheng Yue<sup>a</sup>, Shasha Yi<sup>b</sup>, Runwei Wang<sup>a</sup>, Zongtao Zhang<sup>a,\*</sup> and Shilun Qiu<sup>a</sup>

<sup>a</sup>State Key Laboratory of Inorganic Synthesis and Preparative Chemistry, College of Chemistry, Jilin University, Changchun 130012, China.

<sup>b</sup>Key Laboratory of Automobile Materials, Ministry of Education, Department of Materials Science and Engineering, Jilin University, Changchun 130022, China.

\*Corresponding author: Zongtao Zhang

Tel: +86-431-85168115

Fax: +86-431-85168115

E-mail address: z Zhang@jlu.edu.cn

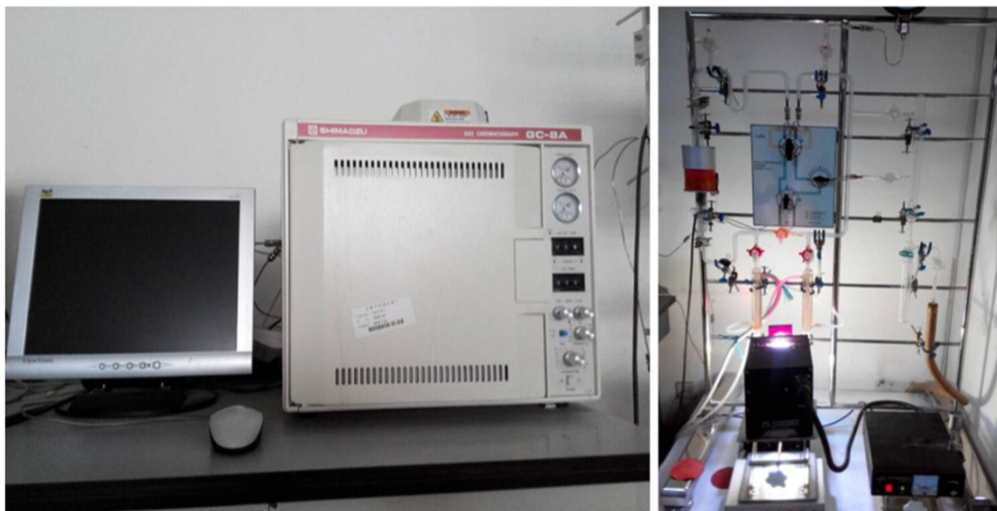

Fig. S1 Hydrogen gas evolution equipments.

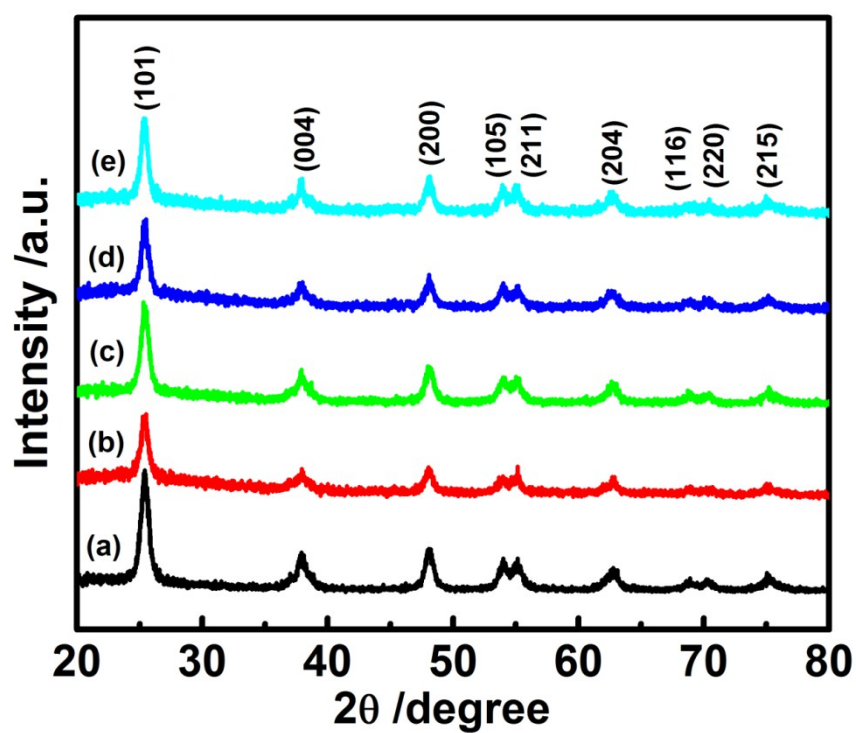

Fig. S2 XRD patterns of the as-prepared  $\text{Cu}_3\text{P}/\text{TiO}_2$  samples with varying  $\text{Cu}_3\text{P}$  to  $(\text{Cu}_3\text{P} + \text{TiO}_2)$  mass ratio of (a) 0.125 wt%, (b) 0.5 wt%, (c) 1 wt%, (d) 2 wt%, and (e) 5 wt%.

All the peaks observed can be ascribed to the planes of anatase phase  $\text{TiO}_2$  (JCPDS-65-5714) and no characteristic diffraction peaks of  $\text{Cu}_3\text{P}$  were observed.

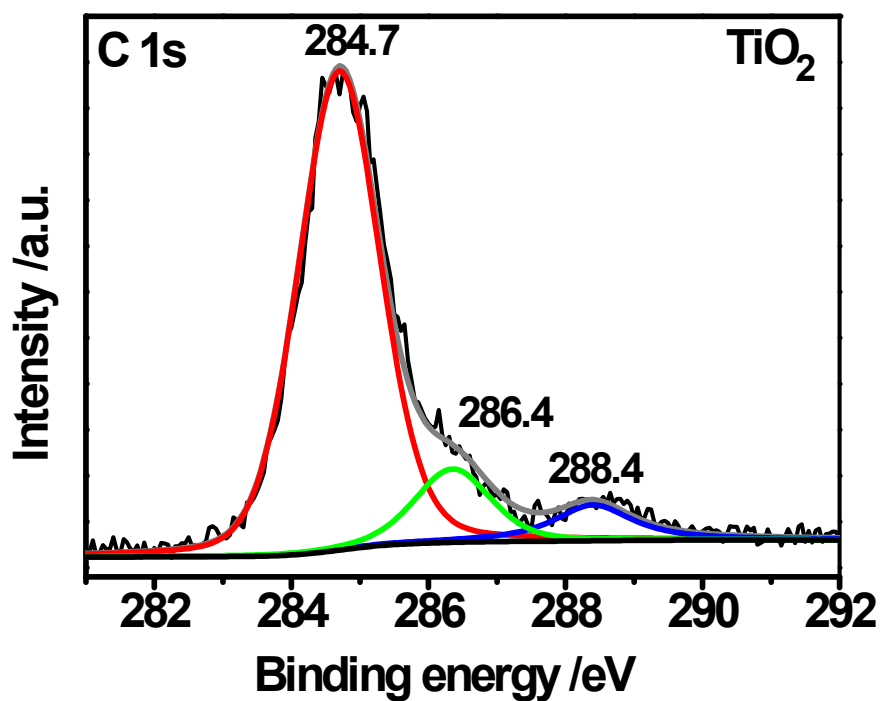

Fig. S3 XPS spectrum of C 1s for TiO<sub>2</sub> sample.

Fig. S3 shows the XPS spectrum of C 1s for pure TiO<sub>2</sub>, the two strong peaks located at 284.7 and 286.4 are characteristic of C-C (mainly the extensively delocalized alternant hydrocarbon) and C-O (the oxygen bound species), respectively. The last peak centered at 288.4 eV can be ascribed to Ti-O-C or O-Ti-C structures, suggesting that the preparation process of TiO<sub>2</sub> leading to the carbon doping into its lattice.<sup>1,2</sup>

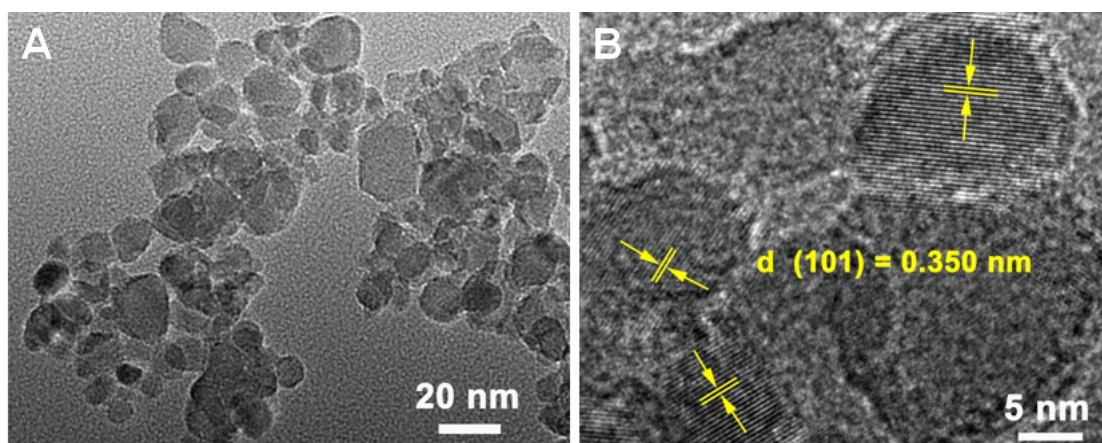

**Fig. S4** (A) TEM and (B) HRTEM images of pure  $\text{TiO}_2$  product.

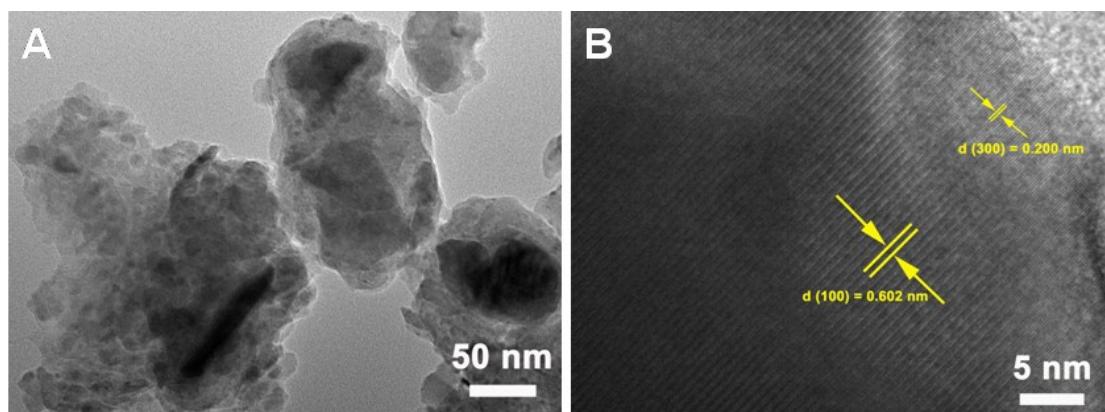

**Fig. S5** (A) TEM and (B) HRTEM images of pure  $\text{Cu}_3\text{P}$  product.

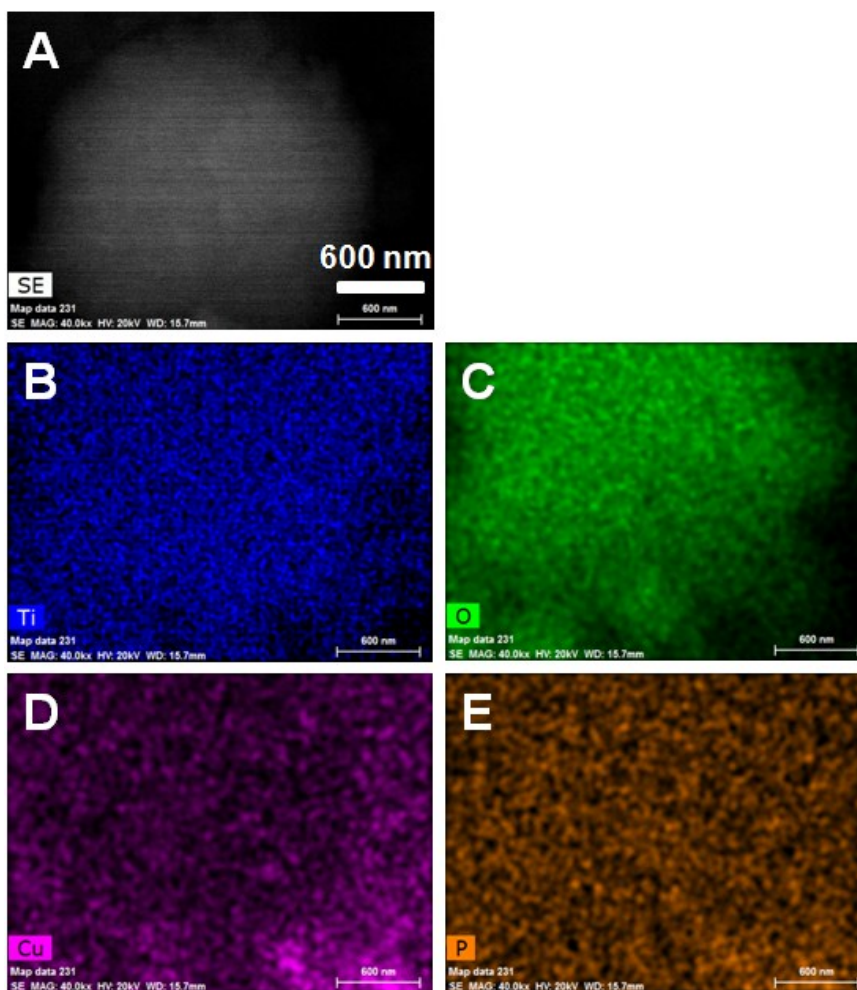

**Fig. S6** (A, B-E) Elemental mapping of Ti, O, Cu, and P elements in the 0.5 wt%  $\text{Cu}_3\text{P}/\text{TiO}_2$  product.

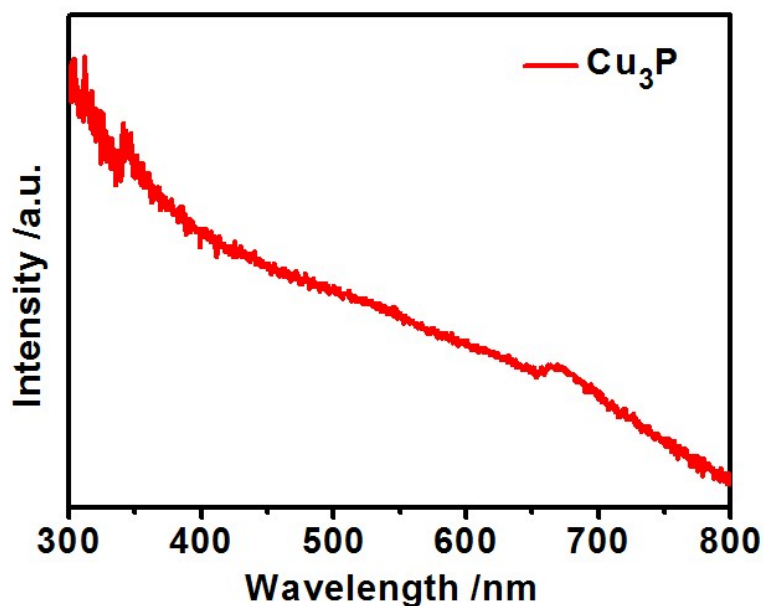

Fig. S7 UV-vis diffuse reflectance spectra (UV-vis DRS) of  $\text{Cu}_3\text{P}$  sample.

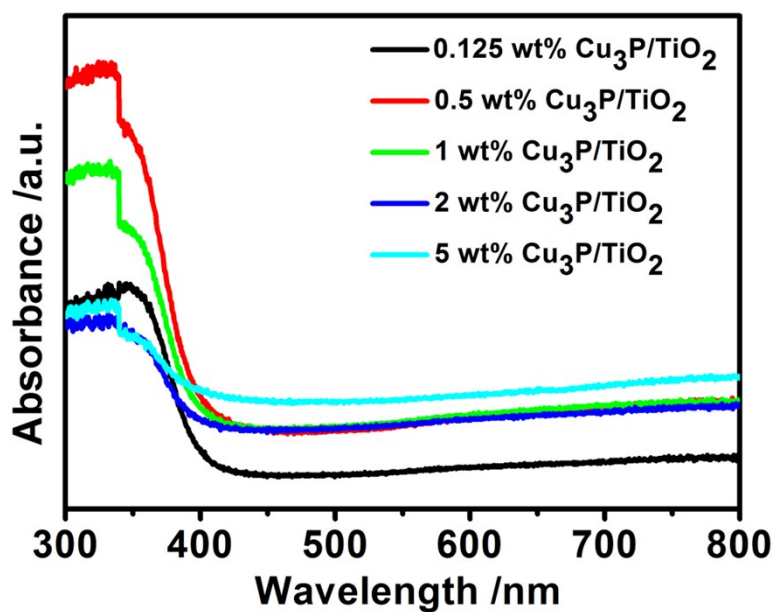

Fig. S8 UV-vis diffuse reflectance spectra (UV-vis DRS) of  $\text{Cu}_3\text{P}/\text{TiO}_2$  samples with varying  $\text{Cu}_3\text{P}$  loading.

With the increase of  $\text{Cu}_3\text{P}$  contents in the range from 0.125 to 5%, absorbance intensity of the composite increased in the region of 400-800 nm, meaning its important influence in photocatalytic activity.

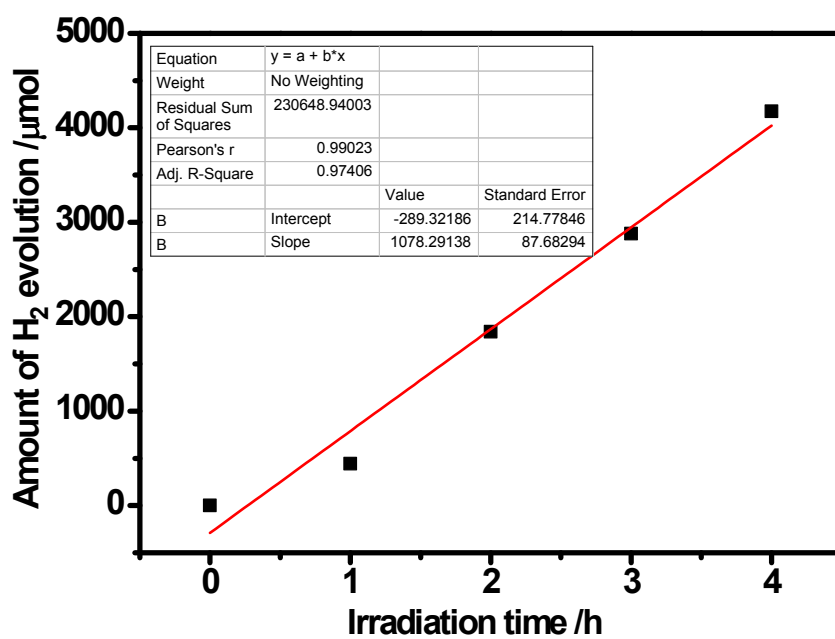

Fig. S9 Photocatalytic H<sub>2</sub> evolution measured for 0.5 wt% Cu<sub>3</sub>P/TiO<sub>2</sub> at 350 nm in 10 vol% of triethanolamine aqueous solution.

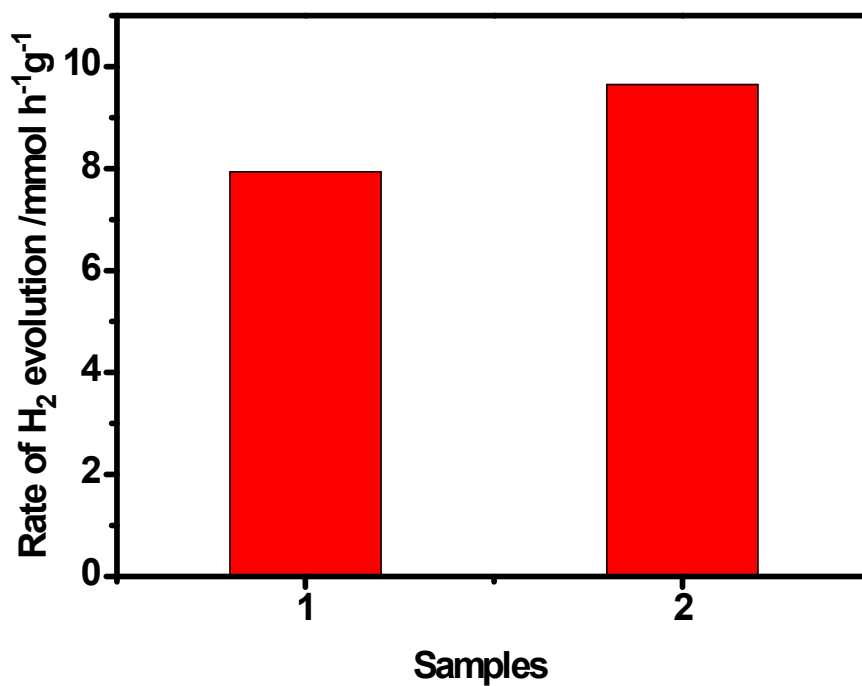

Fig. S10 Comparison of H<sub>2</sub> evolution activities of 0.5 wt% Cu<sub>3</sub>P/TiO<sub>2</sub> (1) with 0.5wt% Pt/TiO<sub>2</sub> (2).

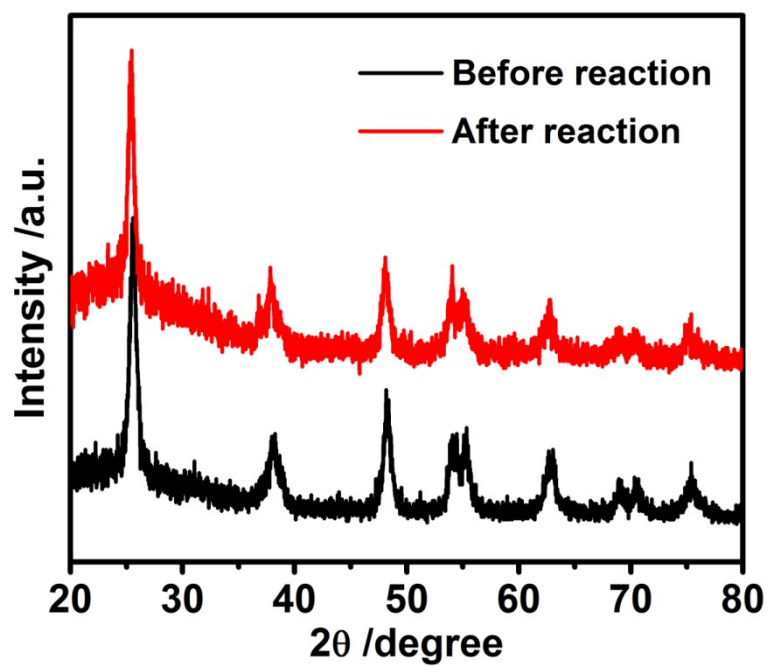

**Fig. S11** XRD patterns of 0.5 wt% Cu<sub>3</sub>P/TiO<sub>2</sub> before and after the recycling experiments.



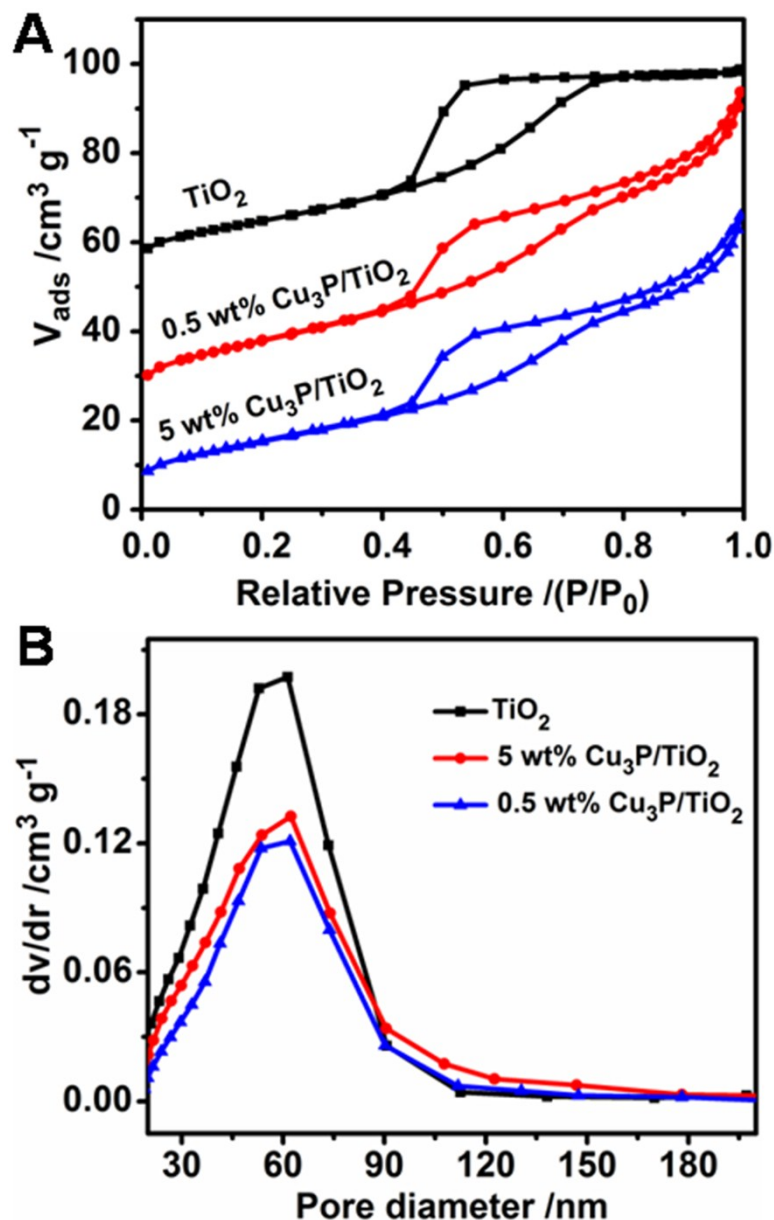

**Fig. S12** (A) BET adsorption-desorption isotherms and (B) BJH pore size distribution curves for as-prepared TiO<sub>2</sub> and Cu<sub>3</sub>P/TiO<sub>2</sub> samples.

The BET surface areas and porous structures of the as-obtained samples were analyzed by performing the nitrogen adsorption-desorption isotherms, shown in Fig. S12. Clearly, the isotherms of all present samples exhibit type V behavior,<sup>3</sup> indicating the presence of mesopore may due to the heap up of TiO<sub>2</sub> NCs. The BET surface areas of the TiO<sub>2</sub> (54.98 m<sup>2</sup> g<sup>-1</sup>), 0.5 wt% Cu<sub>3</sub>P/TiO<sub>2</sub> (66.25 m<sup>2</sup> g<sup>-1</sup>), and 5 wt% Cu<sub>3</sub>P/TiO<sub>2</sub> (56.71 m<sup>2</sup> g<sup>-1</sup>) samples are slightly higher than that of P25 TiO<sub>2</sub> (~50 m<sup>2</sup> g<sup>-1</sup>).<sup>4</sup> Fig. S12 shows the BJH pore size distribution of the samples with the pore

volume of TiO<sub>2</sub>, 0.5 wt% Cu<sub>3</sub>P/TiO<sub>2</sub>, and 5 wt% Cu<sub>3</sub>P/TiO<sub>2</sub> are 0.12, 0.13 and 0.20 m<sup>3</sup> g<sup>-1</sup>, corresponding to their average pore diameters are 61.4, 62.3, and 62.1 nm, respectively. The above data illustrate that the distribution of BET surface area, pore volume and pore size were rather narrower, therefore, it is not the main reason for the enhanced photocatalytic H<sub>2</sub>-evolution activity.

**Table S1.** The loading weight percentage of Cu<sub>3</sub>P in Cu<sub>3</sub>P/TiO<sub>2</sub> hybrid.

|               | 1         | 2         | 3         | 4         | 5        |
|---------------|-----------|-----------|-----------|-----------|----------|
| Theory values | 0.125 wt% | 0.5 wt%   | 1 wt%     | 2 wt%     | 5 wt%    |
| ICP values    | 0.092 wt% | 0.435 wt% | 0.917 wt% | 1.916 wt% | 4.892wt% |

**Table S2.** Values of calculated E<sub>CB</sub> and E<sub>VB</sub> for TiO<sub>2</sub> and Cu<sub>3</sub>P.

| Semiconductor     | E <sub>g</sub> (eV) | E <sub>VB</sub> (eV) | E <sub>CB</sub> (eV) |
|-------------------|---------------------|----------------------|----------------------|
| TiO <sub>2</sub>  | 3.18                | 2.84                 | -0.34                |
| Cu <sub>3</sub> P | 1.50                | 2.17                 | 0.67                 |

**Table S3.** Comparison of photocatalytic hydrogen evolution performances for Cu<sub>3</sub>P/TiO<sub>2</sub> system with other promising photocatalysts.

| Photocatalyst                          | Light source   | H <sub>2</sub> (μmol h <sup>-1</sup> g <sup>-1</sup> ) | Ref.                                                           |
|----------------------------------------|----------------|--------------------------------------------------------|----------------------------------------------------------------|
| GO/TiO <sub>2</sub>                    | 300 Hg         | 1930                                                   | ChemSusChem 2014, <b>7</b> , 618 <sup>5</sup>                  |
| Cu(OH) <sub>2</sub> /TiO <sub>2</sub>  | UV-LED (365)   | 3418                                                   | Energy Environ. Sci., 2011, <b>4</b> , 1364 <sup>6</sup>       |
| Cu/TiO <sub>2</sub>                    | UV-LED (365)   | 5104                                                   | Nano Lett. 2015, <b>15</b> , 4853 <sup>7</sup>                 |
| Au/B-TiO <sub>2</sub>                  | 300 Xe         | 2740                                                   | ACS Catal. 2014, <b>4</b> , 1451 <sup>8</sup>                  |
| Au@TiO <sub>2</sub> /CdS               | 300 Xe         | 1970                                                   | ACS Appl. Mater. Interfaces 2013, <b>5</b> , 8088 <sup>9</sup> |
| MoS <sub>2</sub> /RGO/TiO <sub>2</sub> | 350 Xe         | 2066                                                   | J. Am. Chem. Soc. 2012, <b>134</b> , 6575 <sup>10</sup>        |
| Cu <sub>2</sub> S/TiO <sub>2</sub>     | 300 Xe         | 1430                                                   | Chem. Commun. 2015, <b>51</b> , 13305 <sup>11</sup>            |
| CNT/TiO <sub>2</sub>                   | 200 Hg         | 2940                                                   | Appl. Catal. B Environ. 2015, <b>179</b> , 574 <sup>12</sup>   |
| CdS/TiO <sub>2</sub>                   | AM 1.5G filter | 436                                                    | J. Phys. Chem. C 2014, <b>118</b> , 23627 <sup>13</sup>        |
| Ni(OH) <sub>2</sub> /TiO <sub>2</sub>  | UV-LED (365)   | 3056                                                   | J. Phys. Chem. C 2011, <b>115</b> , 4953 <sup>14</sup>         |
| Graphene/TiO <sub>2</sub>              | 350 Xe         | 736                                                    | Nanoscale 2011, <b>3</b> , 3670 <sup>15</sup>                  |
| Cu <sub>3</sub> P/TiO <sub>2</sub>     | 300 Xe         | 7940                                                   | This work                                                      |

## References for SI

- 1 Goriparti. S., Miele. E., Prato. M., Scarpellini. A., Marras. S., Monaco. S., Toma. A., Messina. G., Alabastri. A., Angelis. F., Manna. L., Capiglia. C. and Zaccaria. R.,

- ACS Appl. Mater. Interfaces, 2015, **7**, 25139-25146.
- 2 Zhang. Y., Zhao. Z., Chen. J., Cheng. L., Chang. J., Sheng.W., Hu. C. and Cao. S.,  
Appl. Catal. B: Environ., 2015, **165**, 715-722.
- 3 Cao. S., Chen. Y., Hou. C., Lu. X. and Fu, W., J. Mater. Chem. A, 2015, **3**, 6096-  
6101.
- 4 Li. M., Liu. X., Xiong. Y., Bo. X., Zhang. Y., Han. C. and Guo, L., J. Mater. Chem.  
A, 2015, **3**, 4255-4265.
- 5 Liu. L., Liu. Z., Liu. A., Gu. X., Ge. C., Gao. F. and Dong. L., ChemSusChem,  
2014, **7**, 618-626.
- 6 Yu. J. and Ran., J., Energy Environ. Sci., 2011, **4**, 1364-1371.
- 7 Xiao. S., Liu. P., Zhu. W., Li. G., Zhang. D., Li. H., Nano Lett., 2015, **15**, 4853-  
4858.
- 8 Wang. F., Jiang. Y., Gautam. A., Li. Y. and Amal. R., ACS Catal., 2014, **4**, 1451-  
1457.
- 9 Fang. J., Xu. L., Zhang. Z., Yuan. Y., Cao. S., Wang. Z., Yin. L., Liao. Y. and Xue.  
C., ACS Appl. Mater. Interfaces, 2013, **5**, 8088-8092.
- 10 Xiang. Q., Yu. J. and Jaroniec. M., J. Am.Chem. Soc., 2012, **134**, 6575-6578.
- 11 Zhou. Y., Lei. Y.,Wang. D., Chen., C., Peng. Q. and Li. Y., Chem. Commun.,  
2015, **51**, 13305-13308.
- 12 Moya. A., Cherevan. A., Marchesan. S., Gebhardt. P., Prato. M., Eder. D. and  
Vilatela. J., Appl. Catal. B: Environ., 2015, **179**, 574-582.
- 13 Lee. S., Lee. K., Kim. W., Lee. S., Shin. D. and Lee. D., J. Phys. Chem. C, 2014,  
**118**, 23627-23634.

14 Yu. J., Hai. Y. and Cheng. B., J. Phys. Chem. C, 2011, **115**, 4953-4958.

15 Qunjun Xiang. Q., Jianguo Yu. J. and Jaroniec. M., Nanoscale 2011, **3**, 3670-3678.
